# Supplementary material for: Cross-site and higher-order human papillomavirus-related multiple primary cancers: A long-term risk assessment using the Surveillance, Epidemiology, and End Results database
Source: Research Square preprint supplement (doi:10.21203/rs.3.rs-7498322/v1), 2025-09-22
Supplement: Supplementary file 1 [file 2d982dc1deabd4350b6cc2a6.pdf]

**Figure legends**

Supplementary Figure S1. (a) Annual number of cancer cases recorded in the SEER-21 registry. (b)  
Annual number of cancer cases recorded in the SEER-8 registry.
