# Supplementary material for: Cross-site and higher-order human papillomavirus-related multiple primary cancers: A long-term risk assessment using the Surveillance, Epidemiology, and End Results database
Source: Research Square preprint supplement (doi:10.21203/rs.3.rs-7498322/v1), 2025-09-22
Supplement: Supplementary file 1 [file 55145ddc1b1d3953beab60cc.xlsx]

## Sheet: Sheet1
Supplementary Table S2. Lip cancer vs. all other cancers.
		Number of third or higher MPCs	Lip (n = 21,121)	All others (n = 15,861,435)	p
Age (years)	0–39	Yes	3 (0.4%)	3148 (0.3%)	<0.001
		No	676 (99.6%)	914,621 (99.7%)
	40–64	Yes	140 (1.9%)	90,756 (1.5%)
		No	7408 (98.1%)	6,121,061 (98.5%)
	65–74	Yes	248 (4.7%)	152,718 (3.5%)
		No	5048 (95.3%)	41,988,081 (96.5%)
	≥75	Yes	608 (8.0%)	259,323 (5.9%)
		No	6990 (92.0%)	4,121,727 (94.1%)
Common odds ratio (95% CI) = 1.36 (1.27–1.45)
Abbreviations: MPCs, multiple primary cancers; CI, confidence interval.
Bold values indicate significant differences.
Supplementary Table S3. Tongue cancer vs. all other cancers.
		Number of third or higher MPCs	Tongue (n = 116,761)	All others (n = 15,765,795)	p
Age (years)	0–39	Yes	32 (0.8%)	3119 (0.3%)	<0.001
		No	4046 (99.2%)	911,251 (99.7%)
	40–64	Yes	1388 (2.3%)	89,508 (1.5%)
		No	59,021 (97.7%)	6,069,448 (98.5%)
	65–74	Yes	1790 (5.8%)	151,176 (3.5%)
		No	29,255 (94.2%)	4,173,874 (96.5%)
	≥75	Yes	1968 (9.3%)	257,963 (5.9%)
		No	19,261 (90.7%)	4,109,456 (94.1%)
Common odds ratio (95% CI) = 1.64 (1.60–1.69)
Abbreviations: MPCs, multiple primary cancers; CI, confidence interval.
Bold values indicate significant differences.
Supplementary Table S4. Floor of mouth cancer vs. all other cancers.
		Number of third or higher MPCs	Floor of mouth (n = 18,326)	All others (n = 15,864,230)	p
Age (years)	0–39	Yes	2 (0.8%)	3149 (0.3%)	<0.001
		No	236 (99.2%)	915,061 (99.7%)
	40–64	Yes	319 (3.3%)	90,577 (1.5%)
		No	9327 (96.7%)	6,119,142 (98.5%)
	65–74	Yes	396 (7.9%)	152,570 (3.5%)
		No	4592 (92.1%)	4,198,537 (96.5%)
	≥75	Yes	422 (12.2%)	259,509 (5.9%)
		No	3032 (87.8%)	4,125,685 (94.1%)
Common odds ratio (95% CI) = 2.30 (2.16–2.44)
Abbreviations: MPCs, multiple primary cancers; CI, confidence interval.
Bold values indicate significant differences.
Supplementary Table S5. Gum and other oral cancers vs. all other cancers.
		Number of third or higher MPCs	Gum and mouth (n = 54,010)	All others (n = 15,828,546)	p
Age (years)	0–39	Yes	26 (1.1%)	3125 (0.3%)	<0.001
		No	2248 (98.9%)	913,049 (99.7%)
	40–64	Yes	799 (3.9%)	90,097 (1.5%)
		No	19,658 (96.1%)	6,108,811 (98.5%)
	65–74	Yes	1138 (8.2%)	151,828 (3.5%)
		No	12,760 (91.8%)	4,190,369 (96.5%)
	≥75	Yes	1753 (10.1%)	258,178 (5.9%)
		No	15,628 (89.9%)	4,113,089 (94.1%)
Common odds ratio (95% CI) = 2.14 (2.07–2.22)
Abbreviations: MPCs, multiple primary cancers; CI, confidence interval.
Bold values indicate significant differences.
Supplementary Table S6. Tonsil cancer vs. all other cancers.
		Number of third or higher MPCs	Tonsil (n = 67,266)	All others (n = 15,815,290)	p
Age (years)	0–39	Yes	6 (0.5%)	3145 (0.3%)	0.299
		No	1127 (99.5%)	914,170 (99.7%)
	40–64	Yes	537 (1.2%)	90,359 (1.5%)
		No	44,424 (98.8%)	6,084,045 (98.5%)
	65–74	Yes	601 (4.0%)	152,365 (3.5%)
		No	14,479 (96.0%)	4,188,650 (96.5%)
	≥75	Yes	448 (7.4%)	259,483 (5.9%)
		No	5644 (92.6%)	4,123,073(94.1%)
Common odds ratio (95% CI) = 1.03 (0.98–1.08)
Abbreviations: MPCs, multiple primary cancers; CI, confidence interval.
Supplementary Table S7. Oropharyngeal cancer vs. all other cancers.
		Number of third or higher MPCs	Oropharyngeal (n = 19,338)	All others (n = 15,863,218)	p
Age (years)	0–39	Yes	3 (1.3%)	3148 (0.3%)	<0.001
		No	221 (98.7%)	915,076 (99.7%)
	40–64	Yes	214 (2.0%)	90,682 (1.5%)
		No	10,302 (98.0%)	6,118,167 (98.5%)
	65–74	Yes	318 (5.8%)	152,648 (3.5%)
		No	5178 (94.2%)	4,197,951 (96.5%)
	≥75	Yes	302 (9.7%)	259,629 (5.9%)
		No	2800 (90.3%)	4,125,917 (94.1%)
Common odds ratio (95% CI) = 1.61 (1.50–1.73)
Abbreviations: MPCs, multiple primary cancers; CI, confidence interval.
Bold values indicate significant differences.
Supplementary Table S8. Anul, anal canal, and anorectal cancers vs. all other cancers.
		Number of third or higher MPCs	Anal, anal canal, and anorectal (n = 62,752)	All others (n = 15,819,804)	p
Age (years)	0–39	Yes	59 (2.7%)	3092 (0.3%)	<0.001
		No	2111 (97.3%)	913,186 (99.7%)
	40–64	Yes	970 (2.9%)	89,926 (1.5%)
		No	32,288 (97.1%)	6,096,181 (98.5%)
	65–74	Yes	690 (4.7%)	152,276 (3.5%)
		No	13,850 (95.3%)	4,189,279 (96.5%)
	≥75	Yes	1034 (8.1%)	258,897 (5.9%)
		No	11,750 (91.9%)	4,116,967 (94.1%)
Common odds ratio (95% CI) = 1.60 (1.54–1.66)
Abbreviations: MPCs, multiple primary cancers; CI, confidence interval.
Bold values indicate significant differences.
Supplementary Table S9. Vaginal cancer vs. all other cancers.
		Number of third or higher MPCs	Vaginal (n = 13,121)	All others (n = 15,869,435)	p
Age (years)	0–39	Yes	13 (2.4%)	3138 (0.3%)	<0.001
		No	527 (97.6%)	914,770 (99.7%)
	40–64	Yes	311 (6.3%)	90,585 (1.5%)
		No	4658 (93.7%)	6,123,811 (98.5%)
	65–74	Yes	328 (10.1%)	152,638 (3.5%)
		No	2919 (89.9%)	4,200,210 (96.5%)
	≥75	Yes	500 (11.5%)	259,431 (5.9%)
		No	3865 (88.5%)	4,124,852 (94.1%)
Common odds ratio (95% CI) = 2.76 (2.60–2.93)
Abbreviations: MPCs, multiple primary cancers; CI, confidence interval.
Bold values indicate significant differences.
Supplementary Table S10. Vulvar cancer vs. all other cancers.
		Number of third or higher MPCs	Vulvar (n = 45,130)	All others (n = 15,837,426)	p
Age (years)	0–39	Yes	54 (2.7%)	3097 (0.3%)	<0.001
		No	1956 (97.3%)	913,341 (99.7%)
	40–64	Yes	809 (4.8%)	90,087 (1.5%)
		No	15,947 (95.2%)	6,112,522 (98.5%)
	65–74	Yes	748 (7.6%)	152,218 (3.5%)
		No	9087 (92.4%)	4,194,042 (96.5%)
	≥75	Yes	1591 (9.6%)	258,340 (5.9%)
		No	14,938 (90.4%)	4,113,779 (94.1%)
Common odds ratio (95% CI) = 2.13 (2.06–2.21)
Abbreviations: MPCs, multiple primary cancers; CI, confidence interval.
Bold values indicate significant differences.
Supplementary Table S11. Penile cancer vs. all other cancers.
		Number of third or higher MPCs	Penile (n = 13,583)	All others (n = 15,868,973)	p
Age (years)	0–39	Yes	0 (0.0%)	3151 (0.3%)	<0.001
		No	524 (100.0%)	914,773 (99.7%)
	40–64	Yes	78 (1.5%)	90,818 (1.5%)
		No	4989 (98.5%)	6,123,480 (98.5%)
	65–74	Yes	146 (4.1%)	152,820 (3.5%)
		No	3404 (95.9%)	4,199,725 (96.5%)
	≥75	Yes	312 (7.0%)	259,619 (5.9%)
		No	4130 (93.0%)	4,124,587 (94.1%)
Common odds ratio (95% CI) = 1.17 (1.07–1.27)
Abbreviations: MPCs, multiple primary cancers; CI, confidence interval.
Bold values indicate significant differences.
Supplementary Table S12. Testicular cancer vs. all other cancers.
		Number of third or higher MPCs	Testicular (n = 91,656)	All others (n = 15,882,556)	p
Age (years)	0–39	Yes	36 (0.1%)	3115 (0.4%)	<0.001
		No	64,202 (99.9%)	851,095 (99.6%)
	40–64	Yes	78 (0.3%)	90,818 (1.5%)
		No	25,099 (99.7%)	6,103,370 (98.5%)
	65–74	Yes	45 (3.1%)	152,921 (3.5%)
		No	1403 (96.9%)	4,201,726 (96.5%)
	≥75	Yes	47 (5.9%)	259,884 (5.9%)
		No	746 (94.1%)	4,127,971 (94.1%)
Common odds ratio (95% CI) = 0.29 (0.25–0.33)
Abbreviations: MPCs, multiple primary cancers; CI, confidence interval.
Bold values indicate significant differences.
