# Supplementary material for: Cross-site and higher-order human papillomavirus-related multiple primary cancers: A long-term risk assessment using the Surveillance, Epidemiology, and End Results database
Source: Research Square preprint supplement (doi:10.21203/rs.3.rs-7498322/v1), 2025-09-22
Supplement: Supplementary file 2 [file 70340f2772aa1c6233799a9e.xlsx]

## Sheet: Sheet1
Supplementary Table 1. SIRs of subsequent cancers following the first primary cancer (total period)
	Subsequent cancer
	All sites		Lip		Tongue		Floor of mouth		Gum and other mouth		Tonsil		Oropharyngeal		Anal, anal canal, and anorectal		Cervical		Vaginal		Vulvar		Penile		Testicular		Prostate
First primary cancer	Observed	SIR (95% CI)	Observed	SIR (95% CI)	Observed	SIR (95% CI)	Observed	SIR (95% CI)	Observed	SIR (95% CI)	Observed	SIR (95% CI)	Observed	SIR (95% CI)	Observed	SIR (95% CI)	Observed	SIR (95% CI)	Observed	SIR (95% CI)	Observed	SIR (95% CI)	Observed	SIR (95% CI)	Observed	SIR (95% CI)	Observed	SIR (95% CI)
All sites	651,946	1.12 (1.11–1.12)*	1288	1.28 (1.22–1.36)*	6853	1.60 (1.56–1.63)*	1252	2.05 (1.94–2.17)*	3762	1.84 (1.78–1.90)*	2497	1.17 (1.13–1.22)*	923	1.39 (1.30–1.48)*	2764	1.34 (1.29–1.39)*	1758	0.83 (0.79–0.87)#	1062	2.59 (2.44–2.75)*	2717	1.86 (1.79–1.93)*	734	1.15 (1.07–1.24)*	852	1.80 (1.68–1.92)*	48,666	0.50 (0.49–0.50)#
Lip	1913	1.44 (1.38–1.51)*	113	37.64 (31.02–45.25)*	29	2.62 (1.75–3.76)*	13	8.55 (4.55–14.62)*	63	13.06 (10.03–16.7)*	13	2.23 (1.19–3.81)*	5	2.94 (0.96–6.87)	6	1.47 (0.54–3.20)	5	2.54 (0.83–5.94)	0	0.00 (0.00–7.09)	6	2.93 (1.08–6.38)*	2	1.04 (0.13–3.76)	2	1.32 (0.16–4.75)	231	0.87 (0.76–0.99)#
Tongue	7108	1.92 (1.87–1.96)*	37	5.32 (3.74–7.33)*	1113	30.40 (28.64–32.24)*	258	54.84 (48.35–61.96)*	415	31.69 (28.71–34.89)*	110	5.05 (4.15–6.08)*	70	11.73 (9.14–14.82)*	11	0.88 (0.44–1.57)	5	0.64 (0.21–1.49)	2	1.31 (0.16–4.74)	17	3.05 (1.78–4.88)*	3	0.64 (0.13–1.88)	3	0.59 (0.12–1.72)	864	1.05 (0.98–1.13)
Floor of mouth	1655	3.10 (2.95–3.25)*	9	9.45 (4.32–17.94)*	167	35.36 (30.20–41.15)*	64	92.53 (71.26–118.16)*	140	76.15 (64.06–89.86)*	39	14.20 (10.10–19.42)*	18	24.01 (14.23–37.95)*	5	2.78 (0.90–6.48)	3	2.44 (0.50–7.12)	1	3.73 (0.09–20.78)	7	7.44 (2.99–15.32)*	0	0.00 (0.00–5.93)	0	0.00 (0.00–6.36)	108	0.94 (0.77–1.13)
Gum and other mouth	3552	2.44 (2.36–2.52)*	64	25.59 (19.71–32.68)*	306	27.91 (24.87–31.22)*	121	76.43 (63.42–91.33)*	748	140.07 (130.21–150.48)*	65	11.52 (8.89–14.69)*	42	25.09 (18.08–33.91)*	13	2.50 (1.33–4.27)*	3	0.59 (0.12–1.73)	2	1.76 (0.21–6.36)	7	1.71 (0.69–3.52)	3	2.02 (0.42–5.89)	3	2.06 (0.43–6.03)	232	0.99 (0.86–1.12)
Tonsil	4251	1.72 (1.67–1.77)*	10	2.13 (1.02–3.92)*	456	15.99 (14.55–17.52)*	39	10.87 (7.73–14.85)*	174	20.10 (17.23–23.32)*	70	3.67 (2.86–4.64)*	59	12.07 (9.19–15.56)*	8	0.95 (0.41–1.86)	3	0.89 (0.18–2.60)	1	1.65 (0.04–9.19)	2	0.93 (0.11–3.37)	4	1.20 (0.33–3.06)	4	0.88 (0.24–2.26)	630	0.99 (0.91–1.07)
Oropharyngeal	752	2.15 (1.99–2.30)*	2	3.09 (0.37–11.16)	67	18.23 (14.13–23.15)*	9	19.00 (8.69–36.06)*	29	24.02 (16.09–34.49)*	14	6.02 (3.29–10.10)*	15	23.43 (13.11–38.65)*	4	3.51 (0.96–9.00)	0	0.00 (0.00–7.13)	1	10.16 (0.26–56.61)	3	9.03 (1.86–26.40)*	1	2.11 (0.05–11.78)	1	2.03 (0.05–11.30)	74	0.84 (0.66–1.05)
Anal, anal canal, and anorectal	2845	1.50 (1.44–1.55)*	5	1.81 (0.59–4.22)	30	2.19 (1.48–3.12)*	5	2.52 (0.82–5.88)	15	2.26 (1.27–3.73)*	21	2.90 (1.80–4.44)*	5	2.43 (0.79–5.66)	279	30.77 (27.26–34.60)*	19	1.82 (1.09–2.84)*	24	11.43 (7.32–17.00)*	74	9.79 (7.69–12.29)*	6	4.73 (1.73–10.29)*	0	0.00 (0.00–2.44)	91	0.43 (0.35–0.53)#
Cervical	4402	1.41 (1.37–1.45)*	5	2.07 (0.67–4.84)	19	1.27 (0.77–1.99)	3	1.35 (0.28–3.94)	14	1.58 (0.86–2.64)	15	2.59 (1.45–4.27)*	4	2.32 (0.63–5.95)	34	1.88 (1.3–2.63)*	253	4.58 (4.03–5.18)*	213	39.92 (34.74–45.66)*	76	4.20 (3.31–5.25)*	N/A	N/A	N/A	N/A	N/A	N/A
Vaginal	423	1.80 (1.63–1.98)*	1	4.34 (0.11–24.18)	1	0.93 (0.02–5.16)	2	10.89 (1.32–39.32)*	1	1.17 (0.03–6.51)	0	0.00 (0.00–10.28)	0	0.00 (0.00–29.61)	4	3.19 (0.87–8.17)	5	2.29 (0.74–5.34)	44	97.70 (70.99–131.16)*	40	26.04 (18.61–35.46)*	N/A	N/A	N/A	N/A	N/A	N/A
Vulvar	2910	2.36 (2.28–2.45)*	4	2.97 (0.81–7.60)	13	2.24 (1.19–3.82)*	4	4.12 (1.12–10.55)*	20	4.25 (2.59–6.56)*	6	3.20 (1.17–6.96)*	2	3.06 (0.37–11.04)	64	9.47 (7.29–12.10)*	29	2.64 (1.77–3.79)*	78	33.42 (26.42–41.72)*	1,073	124.46 (117.12–132.13)*	N/A	N/A	N/A	N/A	N/A	N/A
Penile	742	1.41 (1.31–1.51)*	1	0.84 (0.02–4.68)	6	1.28 (0.47–2.78)	4	6.31 (1.72–16.15)*	7	3.82 (1.53–7.86)*	5	1.92 (0.62–4.48)	0	0.00 (0.00–4.74)	6	4.69 (1.72–10.21)*	N/A	N/A	N/A	N/A	N/A	N/A	127	133.28 (111.11–158.57)*	1	1.40 (0.04–7.82)	100	0.73 (0.60–0.89)#
Testicular	2129	1.44 (1.38–1.50)*	6	1.67 (0.61–3.63)	15	0.69 (0.38–1.13)	3	1.18 (0.24–3.45)	3	0.52 (0.11–1.52)	15	0.81 (0.46–1.34)	3	0.82 (0.17–2.39)	4	0.62 (0.17–1.60)	N/A	N/A	N/A	N/A	N/A	N/A	3	1.09 (0.22–3.18)	450	9.99 (9.09–10.96)*	309	0.94 (0.83–1.05)
Prostate	125,969	0.67 (0.67–0.68)#	331	0.85 (0.76–0.95)#	1173	0.74 (0.70–0.79)#	183	0.84 (0.72–0.97)#	466	0.74 (0.68–0.81)#	743	0.90 (0.84–0.97)#	202	0.75 (0.65–0.86)#	411	0.98 (0.89–1.08)	N/A	N/A	N/A	N/A	N/A	N/A	245	0.75 (0.66–0.85)#	102	0.82 (0.67–0.99)#	177	0.00 (0.00–0.00)#
Abbreviations: CI, confidence interval; N/A, not applicable; SIR, standardized incidence ratio. * = indicates significantly increased risk (p < 0.05); # = indicates significantly decreased risk (p < 0.05). Bold values indicate statistically significant differences.
